## Quantifying coronary microvascular disease: assessing absolute microvascular resistance reserve (MRR) by continuous coronary thermodilution

E. Gallinoro<sup>1</sup>, I. Colaïori<sup>1</sup>, G. Di Gioia<sup>1</sup>, S. Fournier<sup>1</sup>, M. Kodeboina<sup>1</sup>, A. Candreva<sup>1</sup>, J. Sonck<sup>1</sup>, N.H.J. Pijls<sup>2</sup>, C. Collet<sup>1</sup>, B. De Bruyne<sup>1</sup>

<sup>1</sup>Cardiovascular Research Center Aalst, Aalst, Belgium; <sup>2</sup>Catharina Hospital, Department of Cardiology, Eindhoven, Netherlands (The

**Funding Acknowledgement:** Type of funding source: None

**Background and aim:** Hyperemic absolute coronary blood flow (in mL/min) can be safely and reproducibly measured with intracoronary continuous thermodilution of saline at room temperature at an infusion rate of 20 mL/min. This study aims at assessing whether continuous thermodilution can also measure resting flow and microvascular resistance.

**Methods and results:** In 87 coronary arteries (58 patients) with angiographic non-significant stenoses absolute flow was assessed by continuous thermodilution of saline at infusion rates of 10 mL/min and 20 mL/min using a pressure/temperature sensed guide wire, a dedicated infusion catheter and a dedicated software. In addition, in 26 arteries, average peak velocity (APV) was measured simultaneously using an intracoronary Doppler-wire.

There was no significant difference between Pd/Pa at baseline and during saline infusion at 10 mL/min, ( $0.95 \pm 0.053$  vs  $0.94 \pm 0.054$ , respectively ( $p=0.53$ ) and there was no significant difference in APV at baseline and during the infusion of saline at 10 mL/min ( $22.2 \pm 8.40$  vs  $23.2 \pm 8.39$  cm/s, respectively,  $p=0.63$ ), thus indicating presence of resting coronary blood flow during the infusion of 10 mL/min of saline.

In contrast, at an infusion rate of 20 mL/min, a significant decrease in Pd/Pa was observed compared to baseline: ( $0.85 \pm 0.089$  vs  $0.95 \pm 0.053$ ,

respectively,  $p < 0.001$ ) and a significant increase in APV was observed ( $22.2 \pm 8.4$  cm/s to  $57.8 \pm 25.5$  cm/s, respectively,  $p < 0.001$ ). The coronary flow reserve (CFR) calculated by thermodilution and by Doppler flow velocity were similar ( $2.73 \pm 0.85$  vs  $2.72 \pm 1.07$ , respectively) and their individual values correlated closely ( $r=0.87$ , 95% CI 0.72–0.94,  $p < 0.001$ ). Microvascular resistance ( $R_{\mu}$ ), defined as the distal coronary pressure divided by the absolute flow was calculated both at rest ( $R_{\mu}$ -rest) and during hyperemia ( $R_{\mu}$ -hyper). Microvascular Resistance Reserve (MRR), is calculated as the ratio of  $R_{\mu}$ -rest and  $R_{\mu}$ -hyper and showed a good correlation with the analogous Doppler-derived parameter (using the APV instead of absolute flow). Mean doppler and thermodilution derived MRR were similar ( $3.32 \pm 1.50$  vs  $3.23 \pm 1.16$ ) and values correlated closely ( $r=0.91$ , 95% CI 0.81 - 0.96,  $p < 0.001$ ; Bland-Altman analysis: mean bias = 0.071, limit of agreement -1.195 to 1.338).

**Conclusion:** Absolute coronary blood flow (in mL/min) can be measured by continuous thermodilution both at rest and during hyperemia. This allows accurate, reproducible, and operator-independent direct volumetric calculation of CFR and MRR. The latter is a quantitative metric which is specific for microvascular function and independent from myocardial mass.

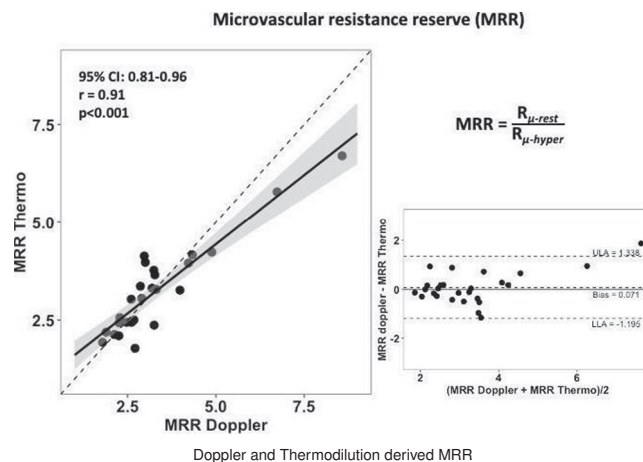

Source: http://academic.oup.com/eurheartj/article-pdf/41/Supplement_2/ehaa946.1282/34516028/ehaa946.1282.pdf
